# Supplementary material for: Short- and long-term effects of transarterial chemoembolization on portal hypertension in patients with hepatocellular carcinoma
Source: PubMed Central journal article supplement — United European Gastroenterol J. 2019 Mar 21;7(6):850–8. doi: 10.1177/2050640619840199 (PMC6620878; doi:10.1177/2050640619840199), 2019-03-21
Supplement: 840199_Supplemental_Material.pdf [file 840199_Supplemental_Material.pdf]

**Supplementary Table 1.** Delta HVPG at month 6 in patients with and without clinical significant portal hypertension at baseline

*Abbreviations:* HVPG hepatic venous pressure gradient;

|              | HVPG<10 mmHg<br>at baseline (n=5) | HVPG≥10 mmHg<br>at baseline (n=8) |
|--------------|-----------------------------------|-----------------------------------|
| ΔHVPG <3mmHg | 2 (40%)                           | 3 (38%)                           |
| ΔHVPG ≥3mmHg | 3 (60%)                           | 5 (62%)                           |

**Supplementary Table 2.** Reasons for unavailable HVPG re-measurements at the different time points

*Abbreviations:* HVPG hepatic venous pressure gradient

| Study population: n=28                                                                              | Acute Effects | Intermediate Effects | Long-term effects |
|-----------------------------------------------------------------------------------------------------|---------------|----------------------|-------------------|
| Patients undergoing repeated HVPG                                                                   | 26 (93%)      | 23 (82%)             | 13 (46%)          |
| Withdrawal of consent to the AVATACE trial                                                          | -             | 2 (7%)               | 2 (7%)            |
| Insufficient resources / invalid measurement / patient refusal to undergo repeated HVPG measurement | 2 (7%)        | 1 (4%)               | 4 (14%)           |
| Death                                                                                               | -             | 2 (7%)               | 8 (29%)           |
| Lost to follow-up                                                                                   | -             | -                    | 1 (4%)            |

**Supplementary Table 3.** Association between radiological tumor progression and changes in HVPG at month 6

*Abbreviations:* HVPG hepatic venous pressure gradient

| <b>Tumor assessment at month 6</b>                           | <b>HVPG increase<br/>&lt;3 mmHg</b> | <b>HVPG increase<br/>≥3 mmHg</b> | <b>p-value</b>               |
|--------------------------------------------------------------|-------------------------------------|----------------------------------|------------------------------|
| <b>Progressive disease</b>                                   | 3 (60%)                             | 1 (12.5%)                        | 0.217                        |
| <b>Complete response, partial response or stable disease</b> | 2 (40%)                             | 7 (87.5%)                        | <i>(Fisher's exact test)</i> |

**Supplementary Figure S1.**

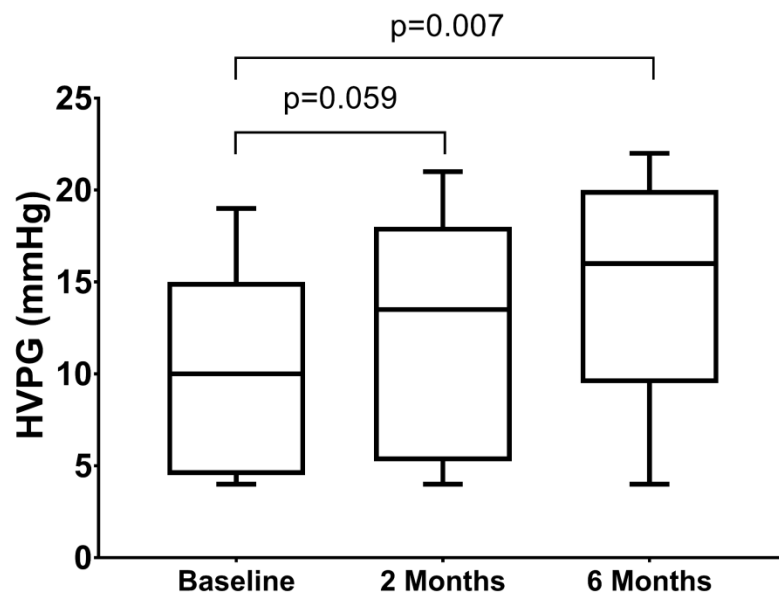

Comparison of HVPG values in the “Long-term effects” group at baseline, as well as after two months and after six months

*Abbreviations:* HVPG hepatic venous pressure gradient;

## Supplementary Figure S2.

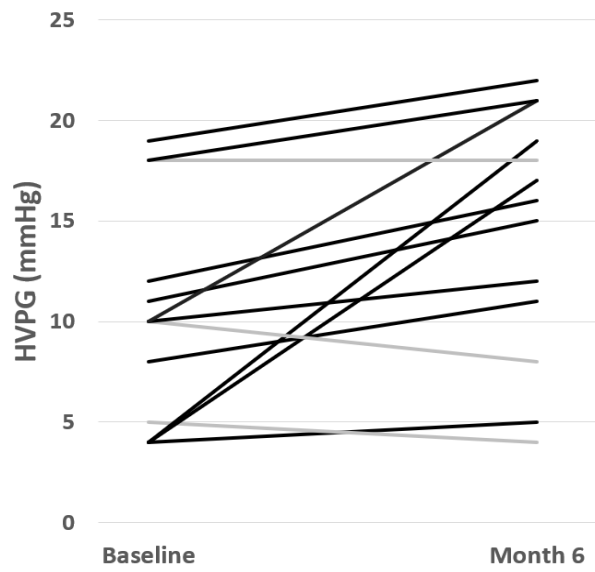

Individual changes in HVPG values from baseline to month 6 in the “Long-term effects” group

*Abbreviations:* HVPG hepatic venous pressure gradient;
